# Supplementary material
Source: PubMed Central journal article supplement (PMC5210713)
Supplement: supp_pp.16.00988_PP2016-00988R3_Supplemental_Material.pdf [file supp_pp.16.00988_PP2016-00988R3_Supplemental_Material.pdf]

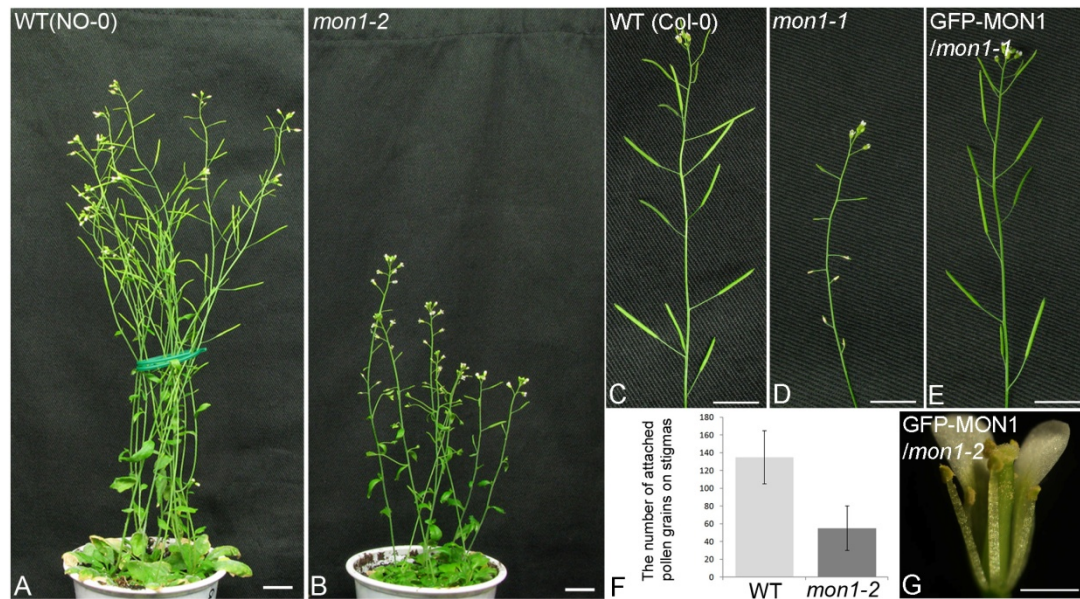

**Supplemental Figure S1.** MON1 is essential for normal plant growth and reproduction.

A to E. The *mon1* mutants were dwarf with reduced fertility and GFP-MON1 recovered this phenotype. Bars = 1 cm.

F and G. Compared to the wild-type, less pollen grains from *mon1-2* were attached to stigmas when hand-pollinated to wild-type stigma (F). GFP-MON1/*mon1-2* showed complete recovery (G). Bars = 1 mm in (G).

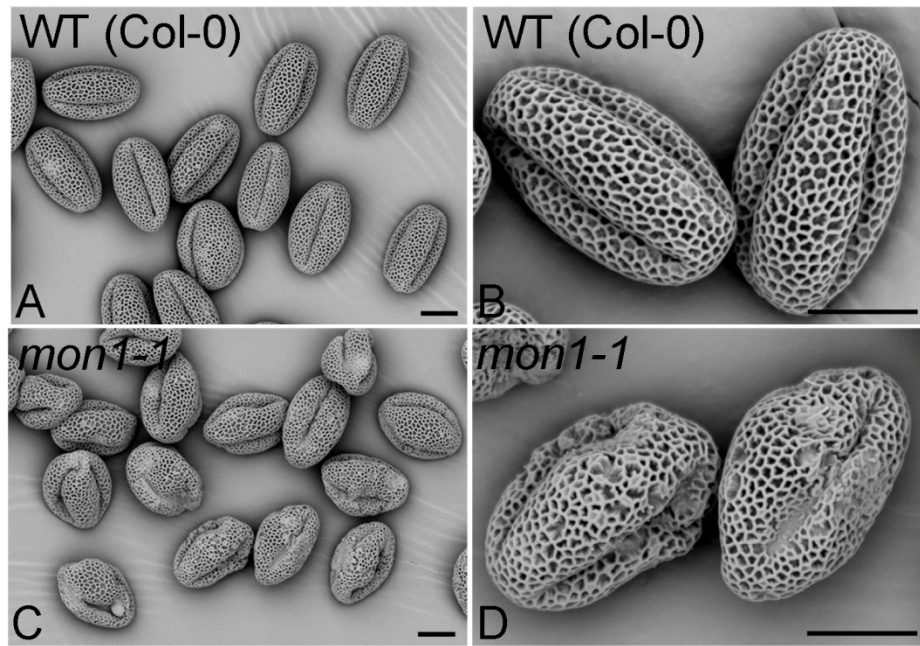

**Supplemental Figure S2.** *MON1* mutation causes defective pollen coat formation.

SEM images showed *mon1-1*<sup>-/-</sup> mutants (C and D) had abnormal pollen coats comparing to the wild-type (A and B). Bars = 10 μm.

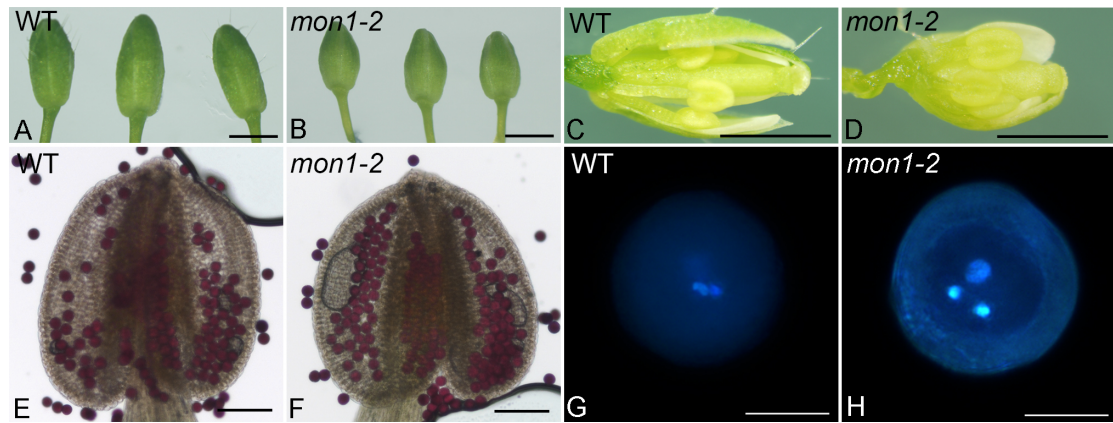

**Supplemental Figure S3.** The *mon1* mutants show normal floral organs and pollen viability.

Morphology of *mon1-2* flowers compared with wild-type (A-D). No difference of floral organs (A to D) and pollen viability (E to H) between wild-type and *mon1* mutants was observed based on Alexander and DAPI staining of mature pollen from wild-type and *mon1-2*. Bars = 1 mm in (A) to (D) and 10  $\mu$ m in (E) to (H).

At2g28390

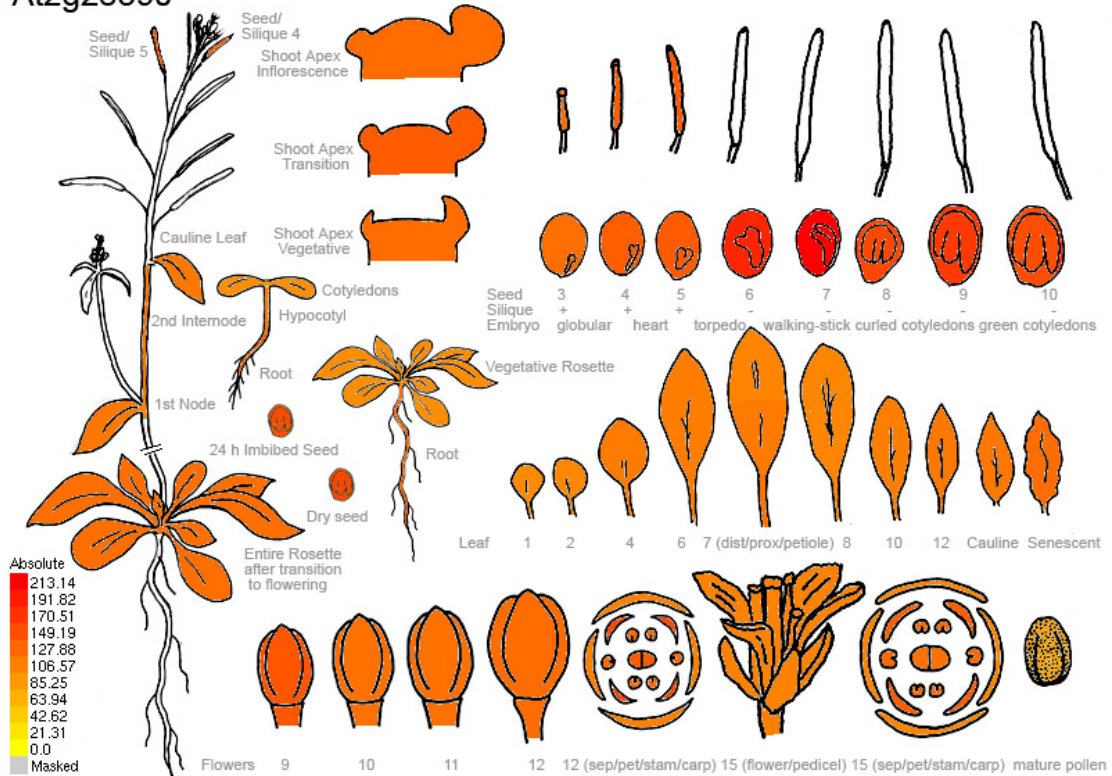

**Supplemental Figure S4.** *Arabidopsis* eFP browser report shows *MON1* gene expression in different plant organs and tissues.

*MON1* showed relative high expression in various organs and tissues, including the flower and pollen.

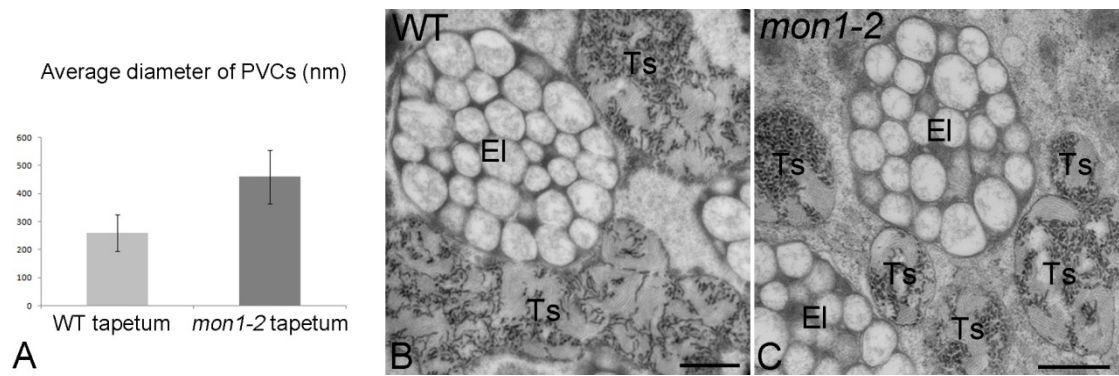

**Supplemental Figure S5.** The *mon1* tapetum shows normal tapetosomes and elaioplasts, but enlarged PVCs in TEM analysis.

A. Statistical analysis of the PVC size in wild-type and *mon1-2* tapetal cells. Each column represents the mean of at least 20 PVCs. Error bars indicate SD.

B and C. TEM images showed normal tapetosomes and elaioplasts in tapetal cells from wild-type and *mon1*. Ts, tapetosome; El, elaioplast. Bars = 500 nm.

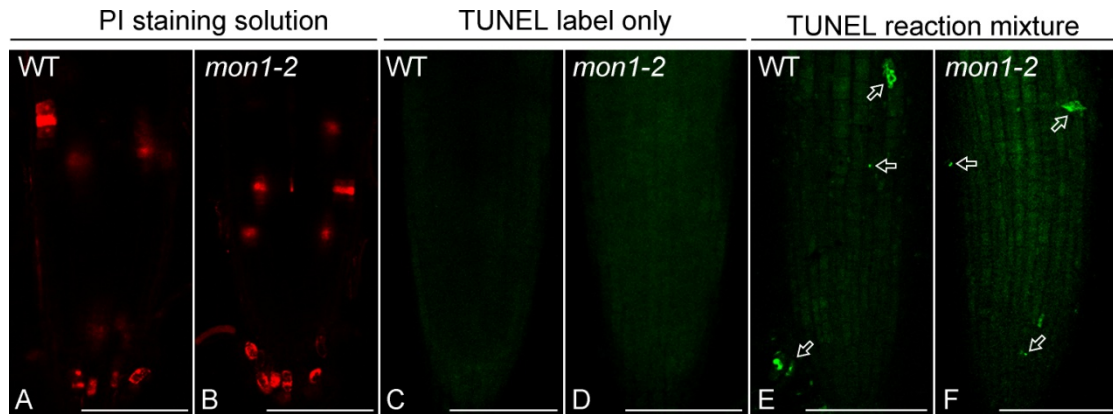

**Supplemental Figure S6.** *MON1* mutation does not significantly alter the PCD in root cap.

A and B. PI stained lateral root cap cells from WT and *mon1-2* were shown. Bars = 100  $\mu$ m.

C to F. Wild-type and *mon1-2* roots were incubated with TUNEL label solution or TUNEL reaction mixture before imaging. The TUNEL positive lateral root cap cells that corresponded to two PCD zones in wild-type and *mon1-2* were indicated by the arrow. Bars = 100  $\mu$ m.

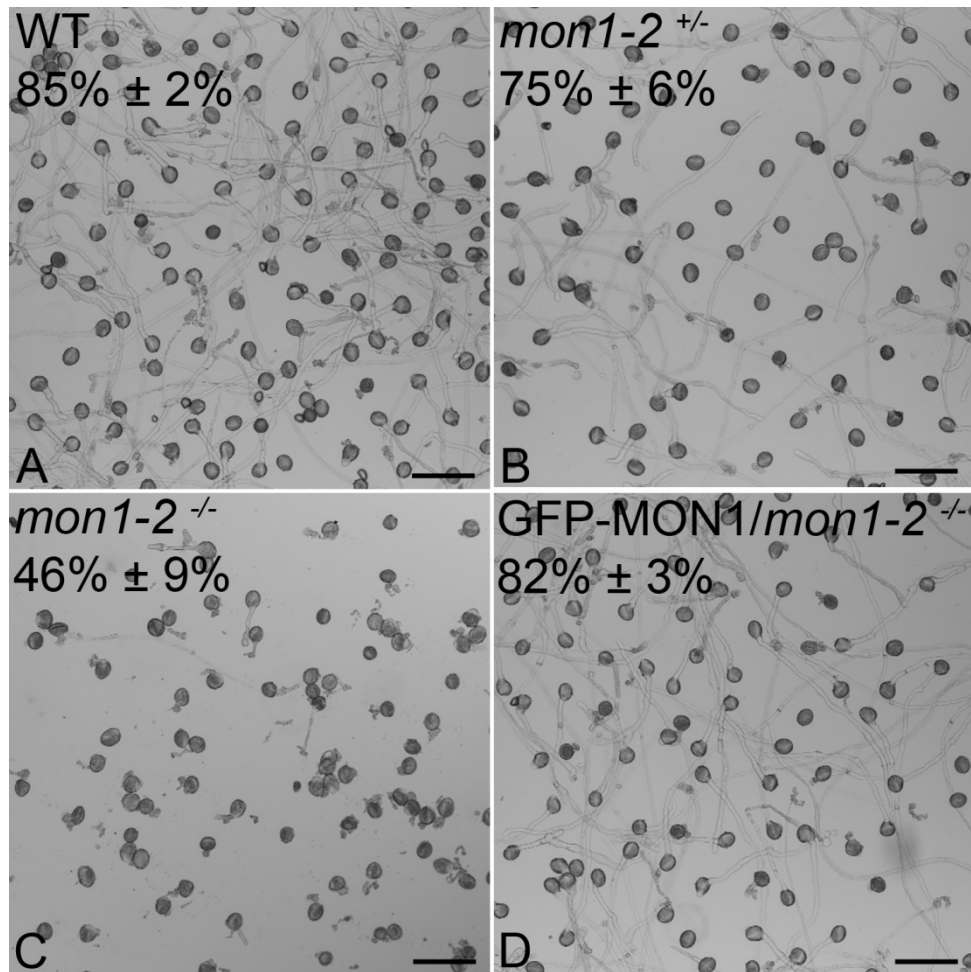

**Supplemental Figure S7.** *MON1* mutation causes defective pollen germination *in vitro*.

The representative images and statistical analysis indicated that homozygous *mon1* mutants (C) showed decreased germination rate comparing to the wild-type (A), heterozygous *mon1* mutants (B) and GFP-MON1/*mon1-2*<sup>−/−</sup> (D) *in vitro*. Bars = 100 μm.

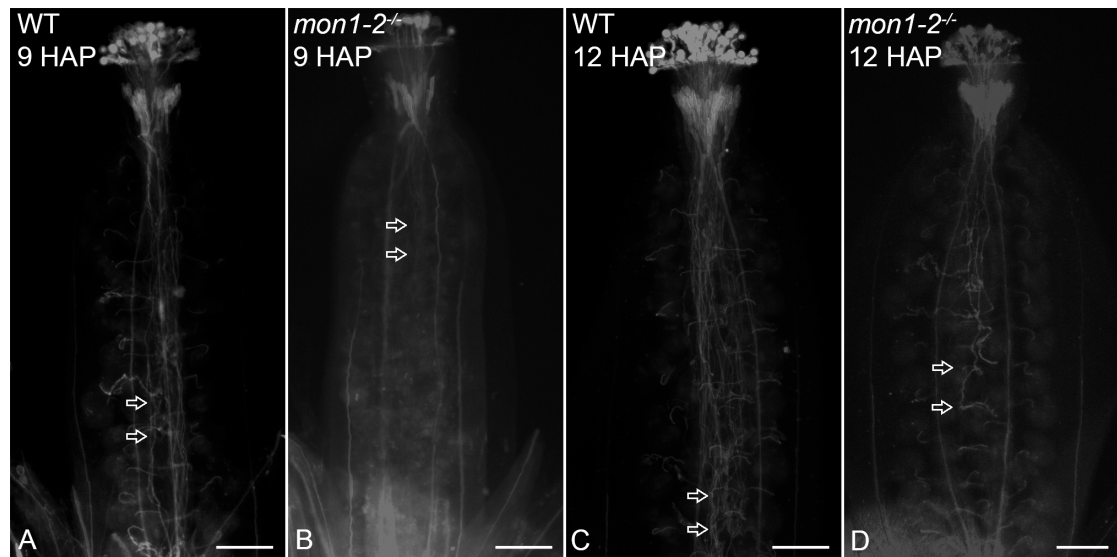

**Supplemental Figure S8.** The *mon1-2* mutants show retarded pollen tube growth *in vivo*.

Aniline blue staining of emasculated wild-type pistils hand-pollinated with *mon1-2* pollen (B and D) showed retarded pollen tube growth of *mon1-2* at indicated times, comparing to the wild-type (A and C). The arrows indicated the pollen tube front. HAP, hours after pollination. Bars = 100  $\mu$ m.

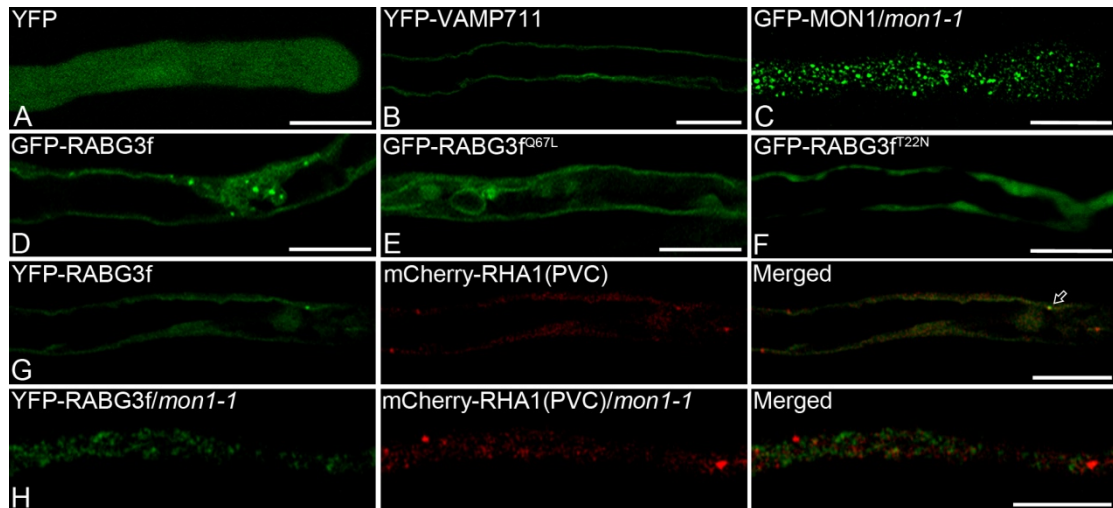

**Supplemental Figure S9.** Loss of function of *MON1* impairs the Rab5-to-Rab7 transition on PVCs in germinated pollen tubes, resulting in their retarded growth.

A to C. In germinated pollen tube, YFP and YFP-VAMP711 showed cytosol and tonoplast pattern respectively, while GFP-MON1 showed punctate pattern. Bars = 10  $\mu$ m.

D to F. In germinated pollen tube, GFP-RABG3f localized to endosomes and tonoplast, GFP-RABG3f<sup>Q67L</sup> localized to tonoplast and GFP-RABG3f<sup>T22N</sup> showed cytosol pattern. Bars = 10  $\mu$ m.

G. In germinated pollen tube, YFP-RABG3f localized to tonoplast and endosomes which were partially colocalized with mCherry-RHA1 positive PVCs (indicated by arrow). Bars = 10  $\mu$ m.

H. In *mon1-1* mutant pollen tube, YFP-RABG3f localized to endosomes, which were separated from mCherry-RHA1 positive PVCs. Bars = 10  $\mu$ m.

**Supplemental Table S1.** *MON1* mutation results in defective male transmission.

| Experiment parent                                           | F1 segregation                    |                |          |
|-------------------------------------------------------------|-----------------------------------|----------------|----------|
| Female × male                                               | Genotype                          | Expected ratio | Observed |
| <i>mon1-1</i> <sup>+/-</sup> × WT                           | <i>MON1-1</i> <sup>+/-</sup> : WT | 1:1            | 49:53    |
| WT × <i>mon1-1</i> <sup>+/-</sup>                           | <i>MON1-1</i> <sup>+/-</sup> : WT | 1:1            | 42:62    |
| <i>mon1-2</i> <sup>+/-</sup> × WT                           | <i>MON1-2</i> <sup>+/-</sup> : WT | 1:1            | 52:55    |
| WT × <i>mon1-2</i> <sup>+/-</sup>                           | <i>MON1-2</i> <sup>+/-</sup> : WT | 1:1            | 44:60    |
| <i>mon1-1</i> <sup>+/-</sup> × <i>mon1-1</i> <sup>+/-</sup> | R:S <sup>a</sup>                  | 3:1            | 346:152  |
| <i>mon1-2</i> <sup>+/-</sup> × <i>mon1-2</i> <sup>+/-</sup> | R:S <sup>b</sup>                  | 3:1            | 316:128  |

<sup>a</sup>R, Kanamycin resistant; S, Kanamycin sensitive.

<sup>b</sup>R, Hygromycin resistant; S, Hygromycin sensitive.

**Supplemental Table S2.** Primers used in this study.

| Construct name | Primer name | Primer sequence (from 5' start to 3' end)            |
|----------------|-------------|------------------------------------------------------|
| MON1           | Forward     | GAATTGATTTAGGTGACACTATAGCGAATTTAGCGG<br>TGGCGGCGAT   |
|                | Reverse     | GAATTGTAATACGACTCACTATAGGGGCTGCGAGG<br>CAGTGTCACCATC |
| GFP-RABG3f     | Forward     | GGGTCTAGAATGCCGTCCCGTAGACGTACCCT                     |
|                | Reverse     | GGGCTCGAGTTAGCATTACACCCTGTAGACCTCT                   |
| RD21-YFP       | Forward     | GGGTCTAGAATGGGGTTCCTTAAGCCAACCATGGC<br>GA            |
|                | Reverse     | GGGCTCGAGGGCAATGTTCTTTCTGCCTTGTGACC<br>A             |
| RD19-YFP       | Forward     | GGGTCTAGAATGGATCGTCTTAAGCTTTATTTCTCC<br>GTTT         |
|                | Reverse     | GGGCTCGAGATGGGCGGTGGTTGAGACGGTGGCT                   |
| RDL1-YFP       | Forward     | GGGGGATCCATGGCTCCTTCAACAAAAGTTCTCTCT<br>TACTT        |
|                | Reverse     | GGGCTCGAGAACACTGCTGATAGTATTTCCACGAAC<br>CGGGTT       |
| AT4G32940-YFP  | Forward     | GGGTCTAGAATGGCCACAACGATGACACGTGTCTC                  |
|                | Reverse     | GGGCTCGAGTGCACTGAATCCACGGTTAAGCGAGC<br>TC            |
| γVPE-YFP       | Forward     | GGGTCTAGAATGGCCACAACGATGACACGTGTCTC<br>CGT           |
|                | Reverse     | GGGCTCGAGTGCACTGAATCCACGGTTAAGCGAGC<br>TC            |
